# Supplementary material for: Additive engineered SnO2-based electron transport layer for the robust and high-efficiency large-scale perovskite solar cell
Source: Royal Society of Chemistry journal article supplement (doi:10.1039/d4ta05866f), 2024-01-01
Supplement: d4ta05866f1.pdf [file d4ta05866f1.pdf]

1

## Electronic Supplementary Information

2

**Additive engineered SnO<sub>2</sub>-based electron transport layer for**

3

**the robust and high-efficiency large-scale perovskite solar cell**

4

*Byeong Jo Kim<sup>1†</sup>, Gabseok Seo<sup>2†</sup>, Sua Park<sup>3</sup>, Donghyeon Lee<sup>3</sup>, Yanqi Luo<sup>4</sup>, Sarah Wieghold<sup>4</sup>,*

5

*Min-cheol Kim<sup>3\*</sup>, Gerrit Boschloo<sup>1\*</sup>*

6

7

<sup>1</sup> Department of Chemistry – Angstrom Laboratory, Physical Chemistry, Box 523, Uppsala University SE-751 20

8

Uppsala, Sweden

9

<sup>2</sup> PSC R&D Dept, UniTest Inc. Pyeongtaek 17791, Republic of Korea

10

<sup>3</sup> School of Mechanical Engineering, Pusan National University, Busan 46241, Republic of Korea

11

<sup>4</sup> Advanced Photon Source, Argonne National Laboratory, Lemont, Illinois 60439, United States

12

13

Correspondence and request for materials should be addressed to M.-c. Kim and G. Boschloo

14

(email: [mckim90@pusan.ac.kr](mailto:mckim90@pusan.ac.kr), [gerrit.boschloo@kemi.uu.se](mailto:gerrit.boschloo@kemi.uu.se))

15

<sup>†</sup> These authors contributed equally to this work

16

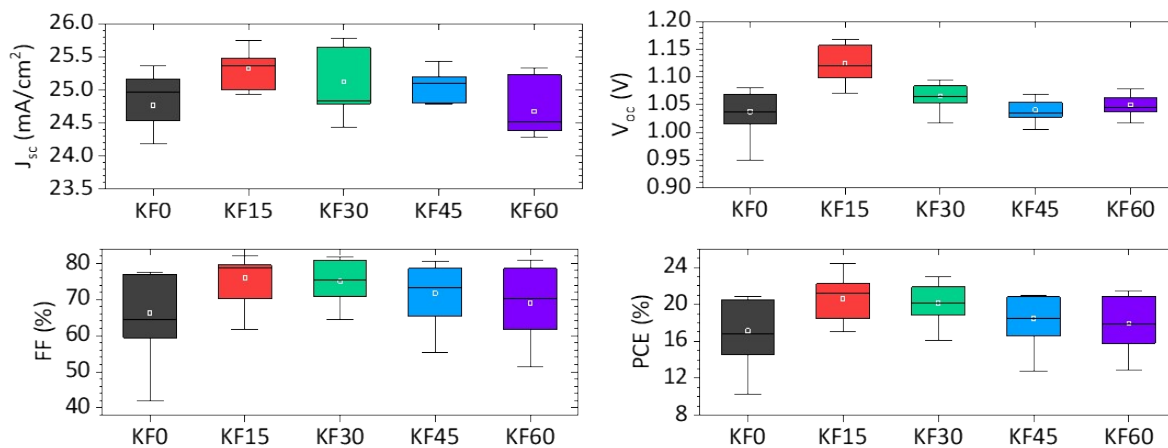

17

18 **Figure S1** The statistics box chart of (a)  $J_{sc}$ , (b)  $V_{oc}$ , (c)  $FF$ , and (d) PCE values obtained KF0,  
 19 KF15, KF30, KF45, and KF60:PSCs. The boxes show the standard deviations,  $n= 30$ ; the  
 20 whiskers represent the 10/90 percentile; the small squares denote the mean, the two horizon  
 21 bars denote the 99 % and 1 % values.

22

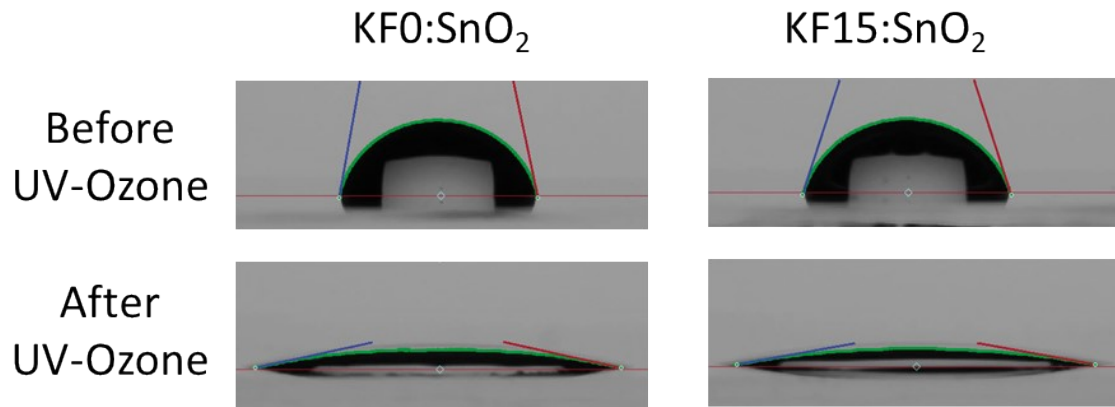

23

24 **Figure S2** The images of (left) KF0, and (right) KF15:SnO<sub>2</sub> dispersion droplets on the  
25 FTO/glass substrate. The images of before/after UV-Ozone was taken at 80 seconds after  
26 dropping of droplet.

27

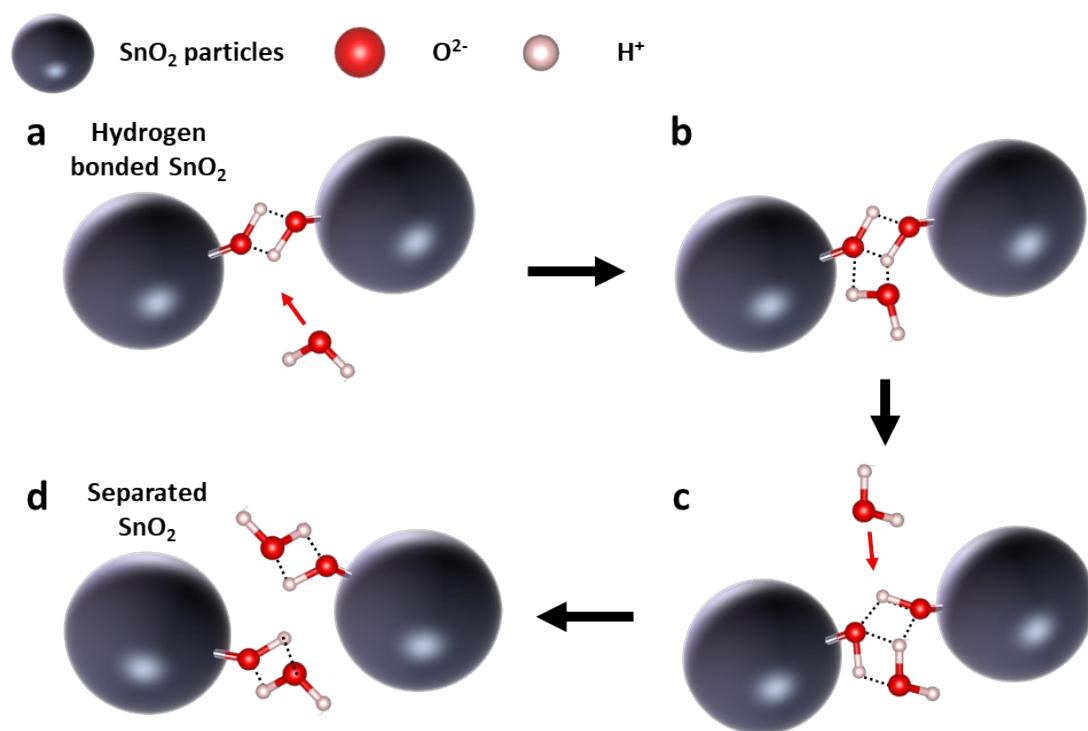

28

29 **Figure S3** The schematic images present the interaction of aqueous  $\text{SnO}_2$  colloidal system. (a)

30 Hydroxyl radical caused hydrogen bonding within neighboring  $\text{SnO}_2$ . (b and c) When two free

31  $\text{H}_2\text{O}$  molecules approach to hydrogen bonding, hydrogen bonds are formed (d) The hydrogen

32 bonds, which contribute to the agglomeration, are dissolved and the bonded  $\text{SnO}_2$  particles get

33 separated.

34

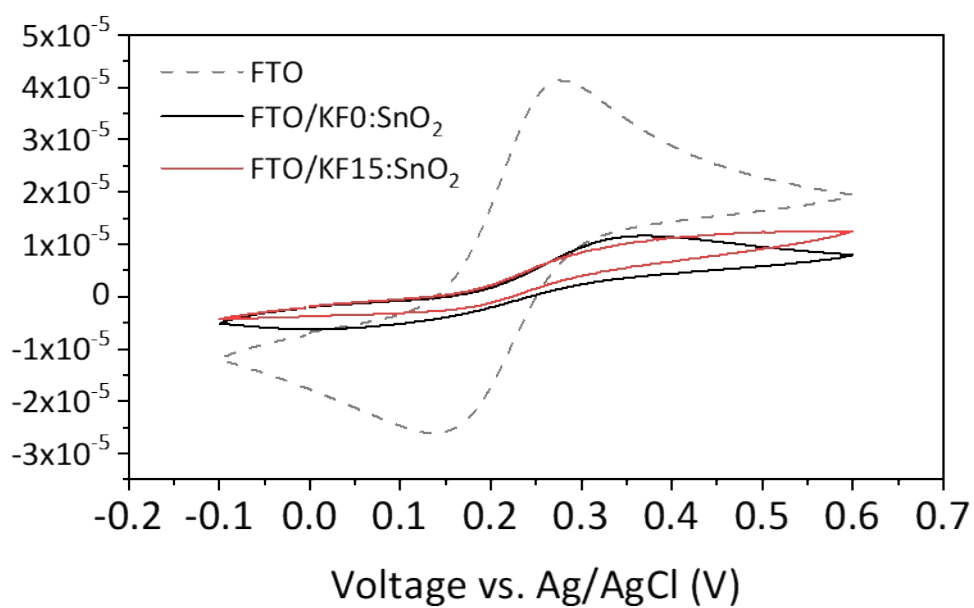

35

36 **Figure S4** Cyclic voltammetry (CV) measurements for bare FTO, KF0:SnO<sub>2</sub>, and KF15:SnO<sub>2</sub>  
37 films deposited on FTO in an aqueous solution of 1 mM K<sub>3</sub>Fe(CN)<sub>6</sub>, 1 mM K<sub>4</sub>Fe(CN)<sub>6</sub> and 0.5  
38 M KCl as the supporting electrolyte.

39

40

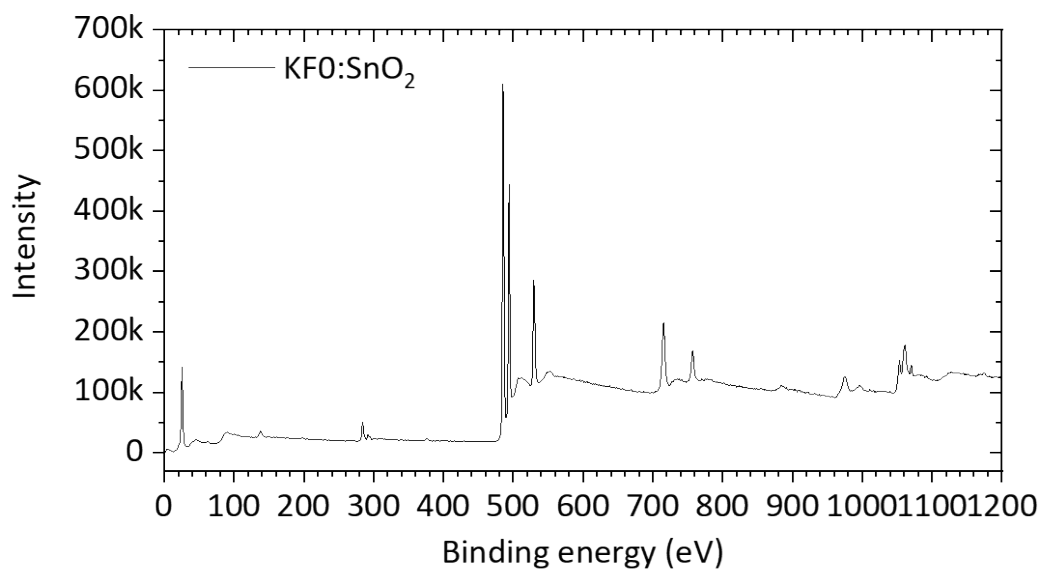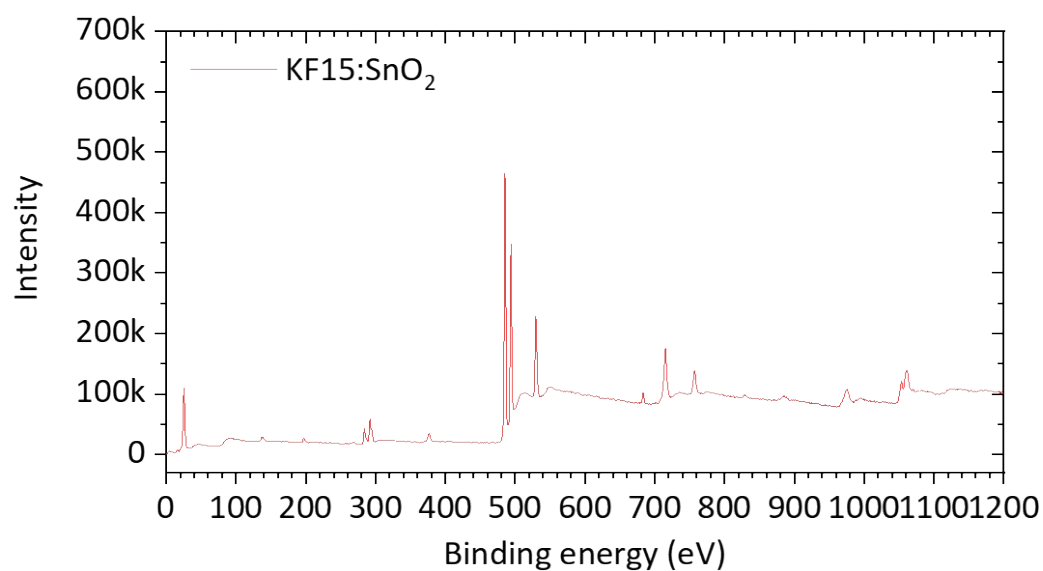

41

42 **Figure S5** Full spectra of X-ray photoemission spectroscopy measurements for (Top) KF0, and  
43 (Bottom) KF15:SnO<sub>2</sub> films

44

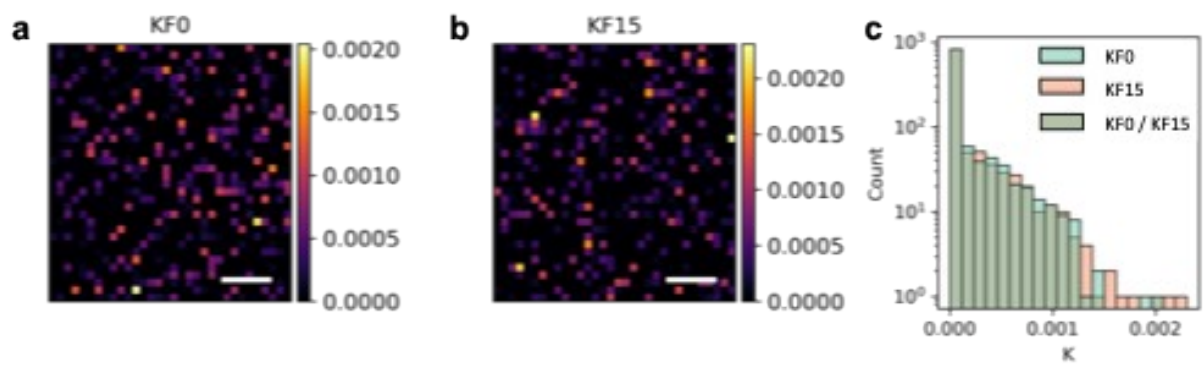

45

46 **Figure S6** X-ray fluorescence (XRF) mappings of elements (K) for (a) KF0:PSC and (b)  
 47 KF15:PSC. (c) K intensity counts for KF0:PSC and KF15:PSC. Legends for intensity counts  
 48 are KF0 (light green), KF15 (light red), KF0/KF15 overlapped (dark green). All scale bars are  
 49  $2\mu\text{m}$ .

50

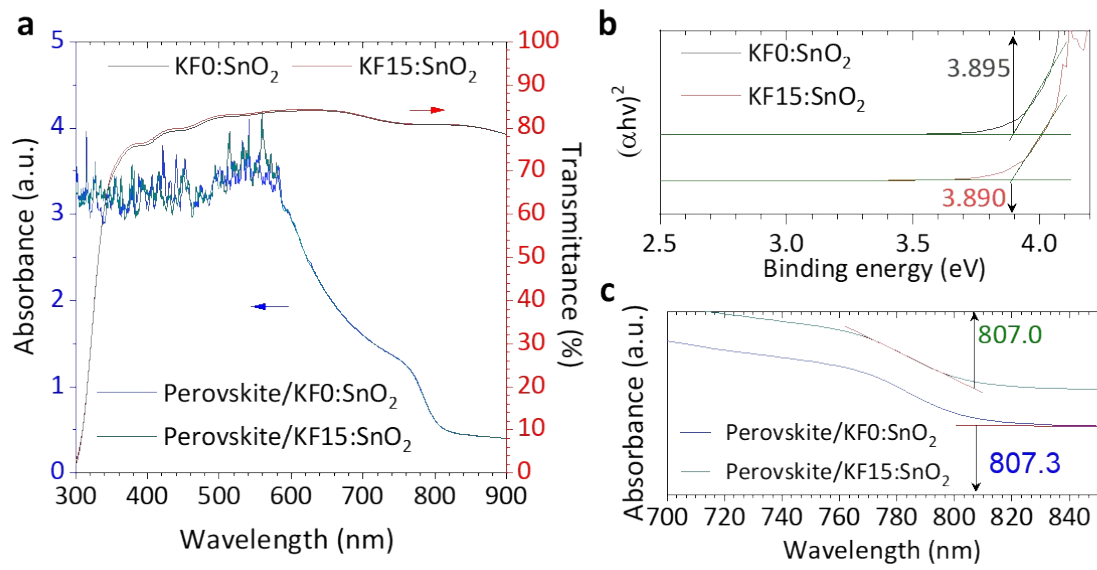

51

52 **Figure S7** (a) Absorption, transmission spectra, (b) Calculated Tauc's plot, and (c) absorption  
 53 cutoff for KF0:PSC and KF15:PSC.

54



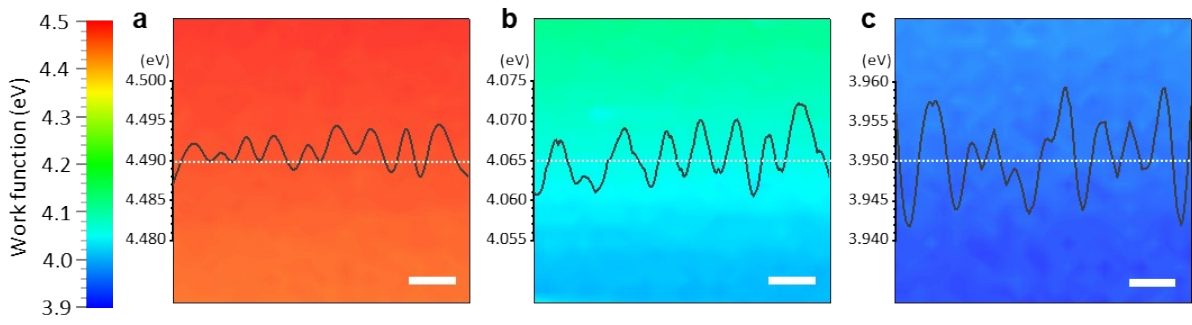

55

56 **Figure S8** Kelvin probe forced microscopy mapping for FTO, KF0:SnO<sub>2</sub>, and KF15:SnO<sub>2</sub>.

57 Scale bar indicates 5 $\mu$ m.

58

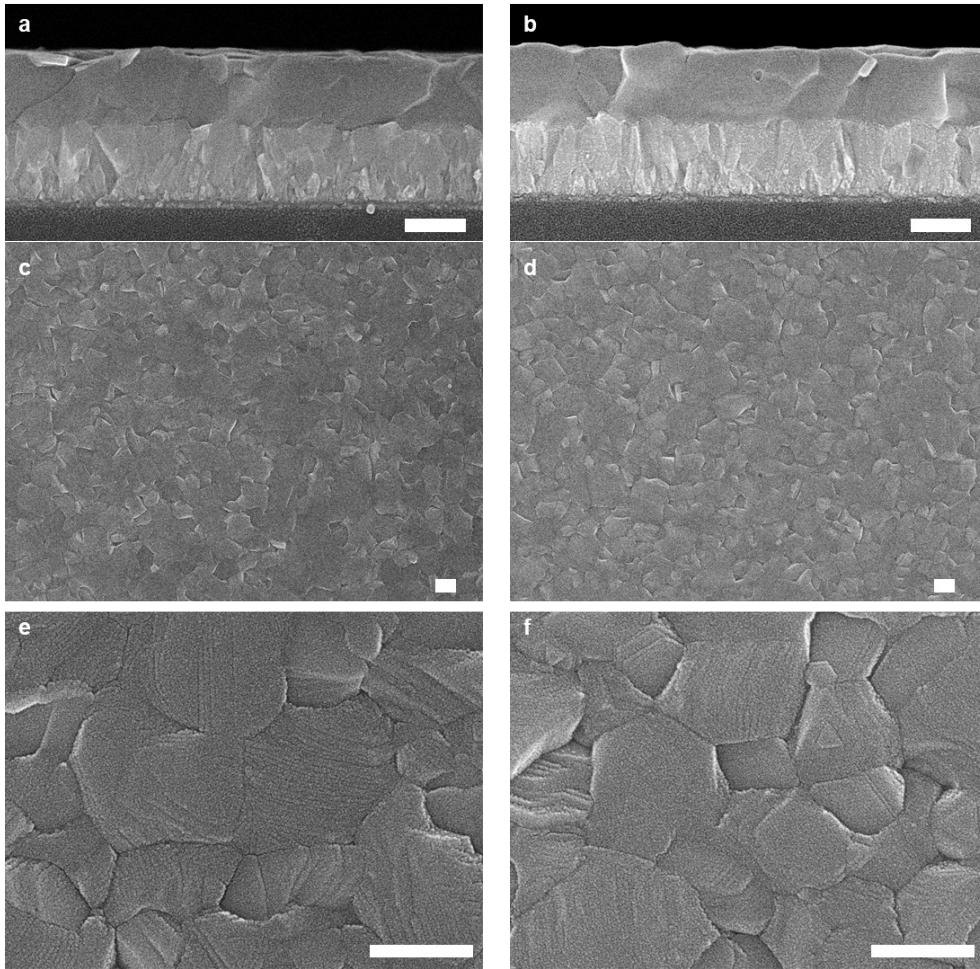

59

60 **Figure S9** (a-b) Cross sectional, (c-d) plane-view, (e-f) zoomed-in plane-view scanning  
61 electron microscopic (SEM) images KF0:PSC and KF15:PSC. Scale bars indicate 500 nm.

62

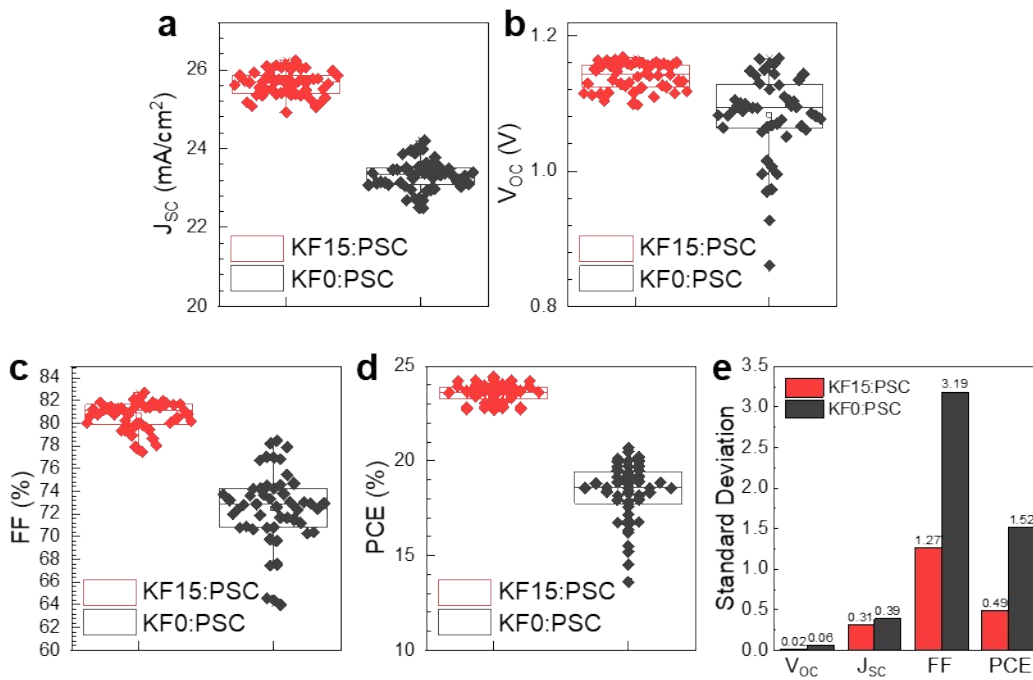

63

64 **Figure S10** Statistic box plots of (a)  $J_{sc}$ , (b)  $V_{oc}$ , (c) FF and (d) PCE for 50 difference devices  
 65 of optimized KF0:PSC and KF15:PSC. (e) Standard deviation values for each photovoltaic  
 66 parameters for KF0:PSC and KF15:PSC.

67

68

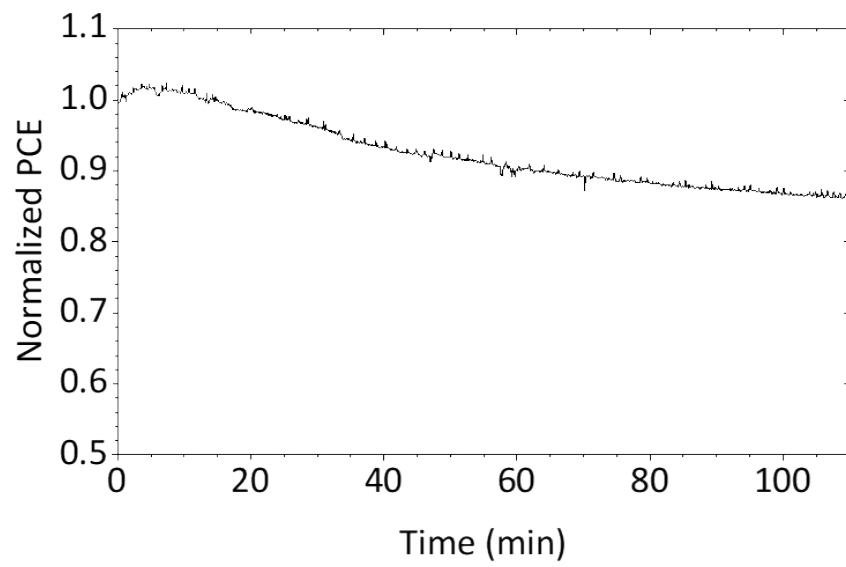

69

70 **Figure S11** Stabilized power output for champion devices using KF15:PSC.

71

72

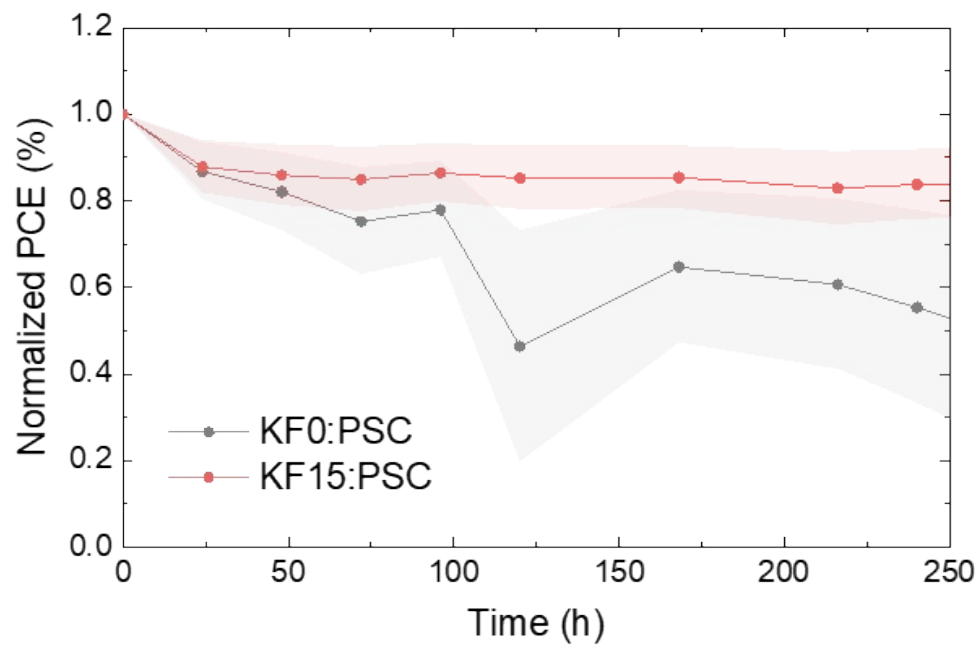

73

74 **Figure S12** Long-term stability test for KF0:PSC and KF15:PSC stored under the identical  
75 60±5 % relative humidity condition.

76

77

|                                        | <b>KF0</b> | <b>KF15</b> | <b>KF30</b> |
|----------------------------------------|------------|-------------|-------------|
| <b>pH</b>                              | 11.35      | 11.18       | 11.14       |
| <b>Average<br/>Zeta potential (mV)</b> | -46.7      | -32.9       | -33.4       |
| <b>Average<br/>Size (d.nm)</b>         | 19.79      | 15.65       | 14.4        |

78

79 **Table S1.** Measured pH, zeta potential, and mean particle size of SnO<sub>2</sub> colloidal dispersion  
80 solution for KF0, KF15, and KF30.

81

| Contact angle (°)      | KF0   |       |       | KF15  |       |       |
|------------------------|-------|-------|-------|-------|-------|-------|
|                        | Left  | Right | Ave.  | Left  | Right | Ave.  |
| <b>Before UV-Ozone</b> | 81.15 | 80.12 | 80.64 | 73.32 | 73.12 | 73.22 |
| <b>After UV-Ozone</b>  | 12.52 | 12.65 | 12.59 | 10.47 | 10.67 | 10.57 |

82

83 **Table S2.** Measured contact angle for KF0 and KF15 SnO<sub>2</sub> dispersion solution on top of the  
84 FTO surface with and without UV-Ozone treatment.

85

| <b>Control SnO<sub>2</sub> (KF0:SnO<sub>2</sub>)</b> |                            |                  |                                 |                               |
|------------------------------------------------------|----------------------------|------------------|---------------------------------|-------------------------------|
| <b>Component</b>                                     | <b>Binding Energy (eV)</b> | <b>FWHM (eV)</b> | <b>Atomic concentration (%)</b> | <b>Mass concentration (%)</b> |
| <b>Sn 3d<sub>5/2</sub></b>                           | 486.10                     | 1.13             | 23.13±0.05                      | 70.00±0.11                    |
| <b>O 1s</b>                                          | 530.00                     | 1.30             | 50.28±0.29                      | 20.50±0.15                    |
| <b>K 2p<sub>3/2</sub></b>                            | 292.50                     | 1.37             | 2.22±0.05                       | 2.04±0.05                     |
| <b>F 1s</b>                                          | -                          | -                | -                               | -                             |
| <b>C 1s</b>                                          | 284.49                     | 1.19             | 24.38±0.31                      | 7.46±0.11                     |

86

87 **Table S3.** Binding energy peak, FWHM, atomic and mass concentration for each component  
88 derived from XPS measurement of KF0:SnO<sub>2</sub>.

89



| <b>KF15:SnO<sub>2</sub></b> |                            |                  |                                 |                               |
|-----------------------------|----------------------------|------------------|---------------------------------|-------------------------------|
| <b>Component</b>            | <b>Binding Energy (eV)</b> | <b>FWHM (eV)</b> | <b>Atomic concentration (%)</b> | <b>Mass concentration (%)</b> |
| <b>Sn 3d<sub>5/2</sub></b>  | 485.87                     | 1.16             | 21.54±0.15                      | 64.87±0.19                    |
| <b>O 1s</b>                 | 529.80                     | 1.36             | 48.19±0.32                      | 19.56±0.16                    |
| <b>K 2p<sub>3/2</sub></b>   | 292.33                     | 1.43             | 8.00±0.11                       | 7.93±0.10                     |
| <b>F 1s</b>                 | 684.19                     | 1.32             | 4.85±0.11                       | 2.34±0.05                     |
| <b>C 1s</b>                 | 284.51                     | 1.26             | 17.43±0.36                      | 5.31±0.12                     |

90

91 **Table S4.** Binding energy peak, FWHM, atomic and mass concentration for each component  
 92 derived from XPS measurement of KF15:SnO<sub>2</sub>.

93

| (Unit: eV)           | KF0:SnO <sub>2</sub> | KF15:SnO <sub>2</sub> | KF0:PSC | KF15:PSC |
|----------------------|----------------------|-----------------------|---------|----------|
| <b>CBM</b>           | 4.15                 | 4.01                  | 3.98    | 3.91     |
| <b>E<sub>F</sub></b> | 4.33                 | 4.17                  | 4.05    | 3.97     |
| <b>E<sub>g</sub></b> | 3.9                  | 3.9                   | 1.53    | 1.53     |
| <b>VBM</b>           | 8.05                 | 7.91                  | 5.51    | 5.44     |

94

95 **Table S5.** Energy band level parameters (CBM, VBM, E<sub>F</sub>, E<sub>g</sub>) for KF0:SnO<sub>2</sub>, KF15:SnO<sub>2</sub>,  
96 KF0:PSC and KF15:PSC estimated by UPS and absorption spectra.

97

|          | Scan direction | $J_{sc}$ (mA·cm <sup>-2</sup> ) | $V_{oc}$ (V) | FF (%) | PCE (%) | Hysteresis index |
|----------|----------------|---------------------------------|--------------|--------|---------|------------------|
| KF0:PSC  | Forward        | 24.47                           | 1.13         | 72.89  | 20.09   | 0.075            |
|          | Reverse        | 24.54                           | 1.12         | 78.53  | 21.60   |                  |
| KF15:PSC | Forward        | 25.66                           | 1.16         | 80.71  | 24.21   | 0.010            |
|          | Reverse        | 25.75                           | 1.16         | 81.76  | 24.46   |                  |

98

99 **Table S6.** Photovoltaic parameters of champion devices for KF0:PSC and KF15:PSC.

100

| Samples                     | A <sub>1</sub> (%) | τ <sub>1</sub> (ns) | A <sub>2</sub> (%) | τ <sub>2</sub> (ns) | τ <sub>ave</sub> (ns) |
|-----------------------------|--------------------|---------------------|--------------------|---------------------|-----------------------|
| Glass/KF0:SnO <sub>2</sub>  | 80.24              | 11.039              | 19.79              | 252.57              | 216.21                |
| Glass/KF15:SnO <sub>2</sub> | 81.55              | 9.20                | 18.45              | 195.58              | 163.50                |

101

102 **Table S7.** Parameters of the TRPL Spectroscopy for Glass/KF0:SnO<sub>2</sub>/Perovskite and  
 103 KF15:SnO<sub>2</sub>/Perovskite. The decay time and amplitude were fitted using bi-exponential decay

104 equation:  $y = y_0 + A_1 * \exp\left(-\frac{x}{\tau_1}\right) + A_2 * \exp\left(-\frac{x}{\tau_2}\right)$ . Average decay time was estimated by

105 using equation:  $\tau_{avg} = \frac{\sum_i \tau_i A_i}{\sum_i A_i}$ .

106

| <b>25cm<sup>2</sup><br/>Aperture</b> | <b>Scan<br/>direction</b> | <b><math>J_{sc}</math><br/>(mA·cm<sup>-2</sup>)</b> | <b><math>V_{oc}</math><br/>(V)</b> | <b>FF<br/>(%)</b> | <b>PCE<br/>(%)</b> |
|--------------------------------------|---------------------------|-----------------------------------------------------|------------------------------------|-------------------|--------------------|
| <b>KF0:PSC<br/>Module</b>            | <b>Reverse</b>            | 20.8                                                | 11.40                              | 74.46             | 17.70              |
|                                      | <b>Forward</b>            | 20.8                                                | 10.88                              | 60.40             | 13.70              |
| <b>KF15:PSC<br/>Module</b>           | <b>Reverse</b>            | 22.9                                                | 10.84                              | 72.47             | 18.02              |
|                                      | <b>Forward</b>            | 22.9                                                | 10.82                              | 72.59             | 17.98              |

107

108 **Table S8.** Photovoltaic parameters of champion devices for KF0:PSC and KF15:PSC module  
109 fabricated with 25cm<sup>2</sup> aperture size.

110
